# Supplementary material for: Canine Intestinal Organoids as a Novel In Vitro Model of Intestinal Drug Permeability: A Proof-of-Concept Study
Source: MDPI journal article supplement (doi:10.3390/cells12091269), 2023-04-27
Supplement: s1 [file s1]

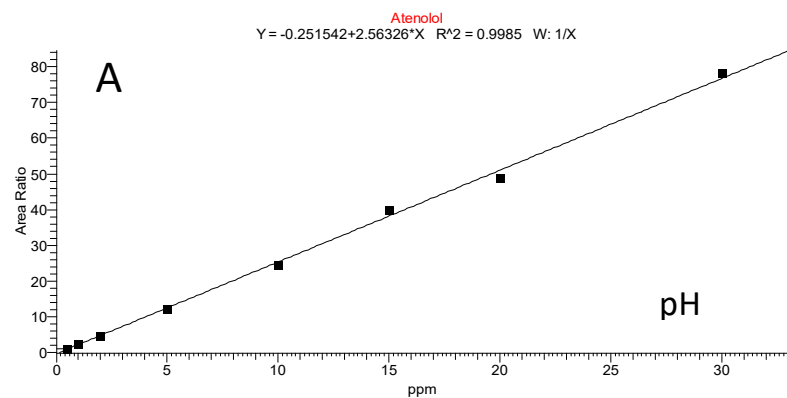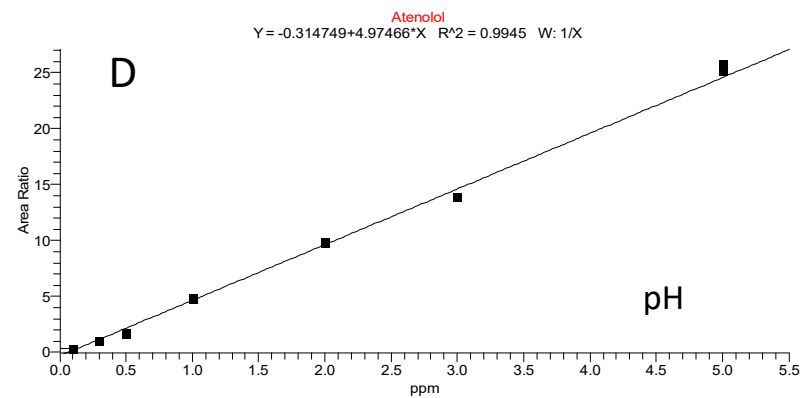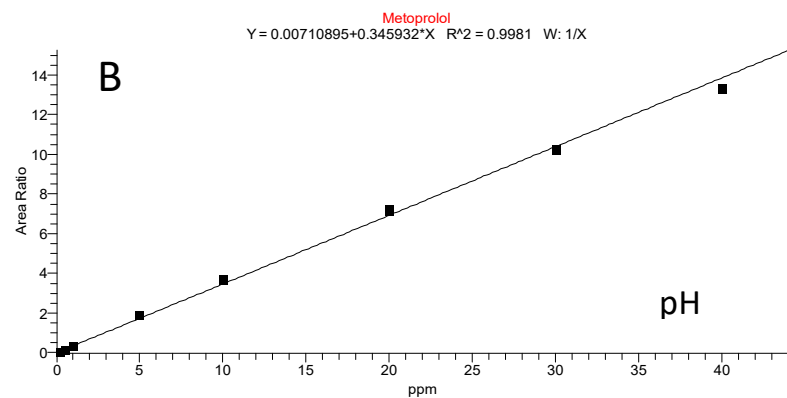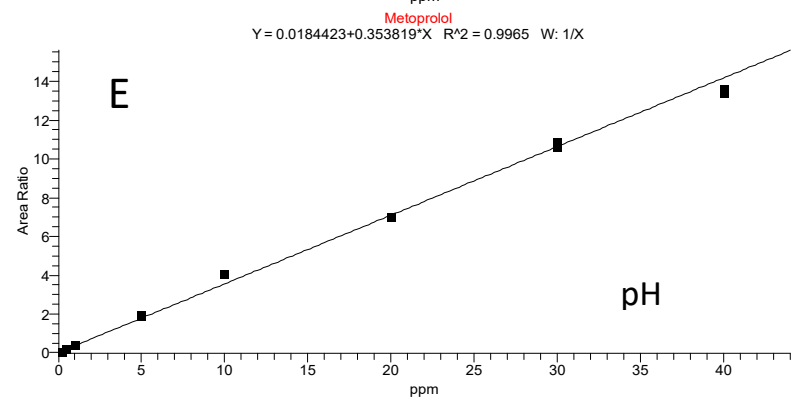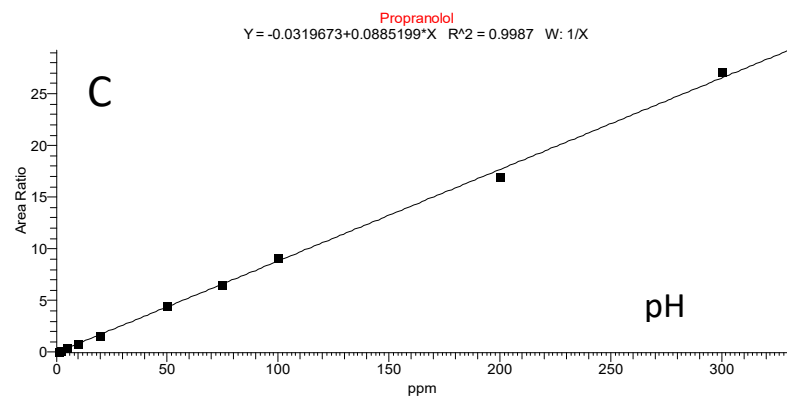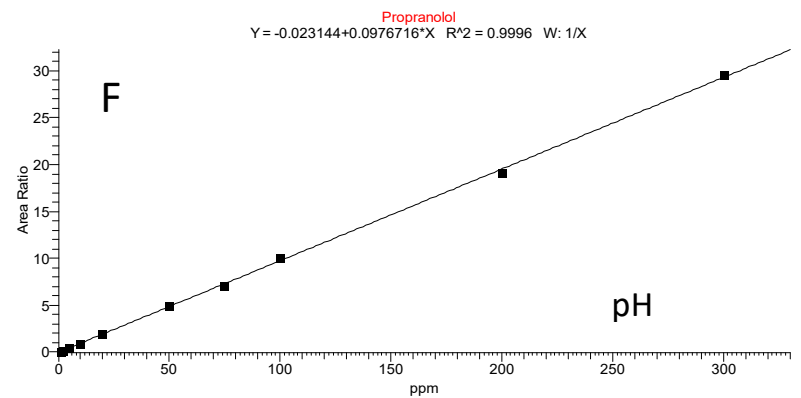

**Supplemental Figure S1:** Representative calibration curves at pH 6.8 for A. Atenolol, B. Metoprolol, C. Propranolol and at pH 7.4 for D. Atenolol, E. Metoprolol, and F. Propranolol.

**Supplemental Table S1**

|                                 | Days | Metoprolol |        | Atenolol |        | Propranolol |        |
|---------------------------------|------|------------|--------|----------|--------|-------------|--------|
| Canine<br>colonoid<br>monolayer |      | Mean       | SD     | Mean     | SD     | Mean        | SD     |
|                                 | 1    | 13.26      | 3.30   | 18.03    | 5.40   | 10.58       | 2.91   |
|                                 | 2    | 79.19      | 23.40  | 83.54    | 22.71  | 71.83       | 15.82  |
|                                 | 3    | 512.42     | 200.30 | 547.54   | 200.73 | 441.38      | 209.88 |
|                                 | 4    | 1152.00    | 102.40 | 1033.59  | 201.67 | 1270.17     | 117.52 |
|                                 | 5    | 1946.83    | 219.80 | 1843.28  | 118.78 | 1665.94     | 148.29 |
|                                 | 6    | 2444.75    | 107.50 | 2232.74  | 126.62 | 2529.14     | 172.05 |
|                                 | 7    | 2724.61    | 127.39 | 2924.34  | 166.15 | 2605.07     | 130.83 |
|                                 | 8    | 3033.20    | 100.71 | 3217.01  | 275.67 | 3136.60     | 237.59 |
|                                 | 9    | 3595.95    | 100.51 | 3659.72  | 121.17 | 3711.78     | 112.31 |
|                                 | 10   | 4006.24    | 250.44 | 4211.72  | 251.65 | 4223.69     | 224.59 |
|                                 | 11   | 4099.73    | 357.43 | 4344.74  | 358.71 | 4238.37     | 253.15 |
|                                 | 12   | 3977.80    | 341.96 | 4205.32  | 342.46 | 4260.19     | 449.26 |
|                                 | 13   | 3032.24    | 356.66 | 3367.85  | 96.98  | 3402.98     | 87.70  |
|                                 | 14   | 2541.86    | 315.42 | 2842.84  | 310.04 | 2703.76     | 211.70 |
|                                 | 15   | 1796.67    | 196.58 | 2121.39  | 76.46  | 1963.67     | 156.75 |

**Supplemental Table S1A.** Continuous TEER ( $\Omega \times \text{cm}^2$ ) analysis over 15 days was used to assess the integrity of each colonoid monolayer (n = 18 used for each drug study) (canine colonoid-derived monolayers with IDs Colonoid#M1 to Colonoid#M54 were used).

|                  | Days | Metoprolol |       | Atenolol |       | Propranolol |       |
|------------------|------|------------|-------|----------|-------|-------------|-------|
| Caco-2 monolayer |      | Mean       | SD    | Mean     | SD    | Mean        | SD    |
|                  | 1    | 34.90      | 10.49 | 28.45    | 5.44  | 31.56       | 3.55  |
|                  | 3    | 178.04     | 30.09 | 161.35   | 23.92 | 172.69      | 28.43 |
|                  | 4    | 239.66     | 12.36 | 244.60   | 18.88 | 228.29      | 8.71  |
|                  | 6    | 280.12     | 28.32 | 265.91   | 29.47 | 253.44      | 20.01 |
|                  | 8    | 278.24     | 21.32 | 288.21   | 22.82 | 273.78      | 10.78 |
|                  | 10   | 314.23     | 31.73 | 300.84   | 39.24 | 308.06      | 27.59 |
|                  | 12   | 346.40     | 33.54 | 347.61   | 40.89 | 334.55      | 34.06 |
|                  | 14   | 370.95     | 49.17 | 367.37   | 39.87 | 360.10      | 37.79 |
|                  | 16   | 412.15     | 43.16 | 405.29   | 41.85 | 395.06      | 26.74 |
|                  | 18   | 487.34     | 61.27 | 495.66   | 58.57 | 472.16      | 66.74 |
|                  | 19   | 474.62     | 71.22 | 523.15   | 36.54 | 513.53      | 35.96 |
|                  | 20   | 526.16     | 43.03 | 503.88   | 41.64 | 506.66      | 46.00 |
|                  | 21   | 502.34     | 42.66 | 493.98   | 34.02 | 483.53      | 34.80 |
|                  | 22   | 322.55     | 45.85 | 327.06   | 71.77 | 314.02      | 74.84 |
|                  | 23   | 259.27     | 68.46 | 251.71   | 53.37 | 241.01      | 49.93 |

**Supplemental Table S1B.** Continuous TEER ( $\Omega \times \text{cm}^2$ ) analysis of the Caco-2 cell monolayer (n = 12 used for each drug study) over 23 days was used to assess monolayer integrity (Caco-2-derived monolayers with IDs Caco-2#M1 to Caco-2#M36 were used).

**Supplemental Table S2**

| <b>Drug Conc.<br/>(mg/mL)</b> | <b>Species</b> | <b>AP<br/>(pH)</b> | <b>Direction</b> | <b>Time (min)</b> | <b>Don. Conc.<br/>(ppm)</b> | <b>Rec. Conc. (ppm)</b> | <b>Replicates</b> |
|-------------------------------|----------------|--------------------|------------------|-------------------|-----------------------------|-------------------------|-------------------|
| Metoprolol<br>(0.4mg/mL)      | Human          | 6.8                | A-B              | 0                 | 487                         | None Detected           | 1                 |
|                               |                |                    |                  | 0                 | 455                         | None Detected           | 2                 |
|                               |                |                    |                  | 120               | 396                         | 13.7                    | 1                 |
|                               |                |                    |                  | 120               | 410                         | 12.6                    | 2                 |
|                               |                |                    |                  | 15                |                             | 2.86                    | 1                 |
|                               |                |                    |                  | 15                |                             | 2.43                    | 2                 |
|                               |                |                    |                  | 30                |                             | 4.91                    | 1                 |
|                               |                |                    |                  | 30                |                             | 4.42                    | 2                 |
|                               |                |                    |                  | 45                |                             | 5.75                    | 1                 |
|                               |                |                    |                  | 45                |                             | 7.68                    | 2                 |
|                               |                |                    |                  | 60                |                             | 7.54                    | 1                 |
|                               |                |                    |                  | 60                |                             | 7.02                    | 2                 |
|                               |                |                    |                  | 90                |                             | 10.9                    | 1                 |
|                               |                |                    |                  | 90                |                             | 9.03                    | 2                 |
| Metoprolol<br>(0.4mg/mL)      | Human          | 7.4                | B-A              | 0                 | 472                         | None Detected           | 1                 |
|                               |                |                    |                  | 0                 | 488                         | None Detected           | 2                 |
|                               |                |                    |                  | 120               | 452                         | 22.7                    | 1                 |
|                               |                |                    |                  | 120               | 499                         | 22.8                    | 2                 |
|                               |                |                    |                  | 15                |                             | 8.41                    | 1                 |
|                               |                |                    |                  | 15                |                             | 8.40                    | 2                 |
|                               |                |                    |                  | 30                |                             | 10.9                    | 1                 |

|                          |     |     |     |     |     |               |   |
|--------------------------|-----|-----|-----|-----|-----|---------------|---|
|                          |     |     |     | 30  |     | 12.9          | 2 |
|                          |     |     |     | 45  |     | 13.3          | 1 |
|                          |     |     |     | 45  |     | 13.4          | 2 |
|                          |     |     |     | 60  |     | 14.5          | 1 |
|                          |     |     |     | 60  |     | 13.3          | 2 |
|                          |     |     |     | 90  |     | 18.1          | 1 |
|                          |     |     |     | 90  |     | 16.7          | 2 |
| Metoprolol<br>(0.4mg/mL) | Dog | 6.8 | A-B | 0   | 231 | None Detected | 1 |
|                          |     |     |     | 0   | 229 | None Detected | 2 |
|                          |     |     |     | 120 | 197 | 5.09          | 1 |
|                          |     |     |     | 120 | 194 | 4.33          | 2 |
|                          |     |     |     | 15  |     | 1.70          | 1 |
|                          |     |     |     | 15  |     | 2.01          | 2 |
|                          |     |     |     | 30  |     | 2.48          | 1 |
|                          |     |     |     | 30  |     | 2.50          | 2 |
|                          |     |     |     | 45  |     | 3.34          | 1 |
|                          |     |     |     | 45  |     | 3.15          | 2 |
|                          |     |     |     | 60  |     | 3.80          | 1 |
|                          |     |     |     | 60  |     | 3.78          | 2 |
|                          |     |     |     | 90  |     | 4.34          | 1 |
|                          |     |     |     | 90  |     | 4.49          | 2 |
| Metoprolol<br>(0.4mg/mL) | Dog | 7.4 | A-B | 0   | 235 | None Detected | 1 |
|                          |     |     |     | 0   | 231 | None Detected | 2 |
|                          |     |     |     | 120 | 168 | 6.49          | 1 |
|                          |     |     |     | 120 | 186 | 5.83          | 2 |
|                          |     |     |     | 15  |     | 2.44          | 1 |

|                            |       |     |     |     |      |               |   |
|----------------------------|-------|-----|-----|-----|------|---------------|---|
|                            |       |     |     | 15  |      | 1.99          | 2 |
|                            |       |     |     | 30  |      | 3.38          | 1 |
|                            |       |     |     | 30  |      | 2.69          | 2 |
|                            |       |     |     | 45  |      | 3.90          | 1 |
|                            |       |     |     | 45  |      | 3.50          | 2 |
|                            |       |     |     | 60  |      | 4.80          | 1 |
|                            |       |     |     | 60  |      | 4.44          | 2 |
|                            |       |     |     | 90  |      | 5.24          | 1 |
|                            |       |     |     | 90  |      | 5.14          | 2 |
| Metoprolol<br>(0.4mg/mL)   | Dog   | 7.4 | B-A | 0   | 237  | None Detected | 1 |
|                            |       |     |     | 0   | 237  | None Detected | 2 |
|                            |       |     |     | 120 | 223  | 10.3          | 1 |
|                            |       |     |     | 120 | 215  | 9.90          | 2 |
|                            |       |     |     | 15  |      | 8.11          | 1 |
|                            |       |     |     | 15  |      | 8.02          | 2 |
|                            |       |     |     | 30  |      | 8.40          | 1 |
|                            |       |     |     | 30  |      | 8.34          | 2 |
|                            |       |     |     | 45  |      | 9.08          | 1 |
|                            |       |     |     | 45  |      | 8.70          | 2 |
|                            |       |     |     | 60  |      | 9.40          | 1 |
|                            |       |     |     | 60  |      | 8.69          | 2 |
|                            |       |     |     | 90  |      | 9.24          | 1 |
|                            |       |     |     | 90  |      | 9.51          | 2 |
| Metoprolol<br>(0.04 mg/mL) | Human | 6.8 | A-B | 0   | 48.5 | None Detected | 1 |
|                            |       |     |     | 0   | 52.6 | None Detected | 2 |
|                            |       |     |     | 120 | 42.1 | 1.43          | 1 |

|                            |       |     |     |     |      |               |   |
|----------------------------|-------|-----|-----|-----|------|---------------|---|
|                            |       |     |     | 120 | 43.3 | 1.62          | 2 |
|                            |       |     |     | 15  |      | 0.310         | 1 |
|                            |       |     |     | 15  |      | 0.273         | 2 |
|                            |       |     |     | 30  |      | 0.356         | 1 |
|                            |       |     |     | 30  |      | 0.465         | 2 |
|                            |       |     |     | 45  |      | 0.806         | 1 |
|                            |       |     |     | 45  |      | None Detected | 2 |
|                            |       |     |     | 60  |      | 0.695         | 1 |
|                            |       |     |     | 60  |      | 0.809         | 2 |
|                            |       |     |     | 90  |      | 1.62          | 1 |
|                            |       |     |     | 90  |      | 1.19          | 2 |
| Metoprolol<br>(0.04 mg/mL) | Human | 7.4 | B-A | 0   | 53.5 | None Detected | 1 |
|                            |       |     |     | 0   | 54.8 | None Detected | 2 |
|                            |       |     |     | 120 | 50.7 | 3.00          | 1 |
|                            |       |     |     | 120 | 46.3 | 3.28          | 2 |
|                            |       |     |     | 15  |      | 0.879         | 1 |
|                            |       |     |     | 15  |      | 0.806         | 2 |
|                            |       |     |     | 30  |      | 1.16          | 1 |
|                            |       |     |     | 30  |      | 1.27          | 2 |
|                            |       |     |     | 45  |      | 1.64          | 1 |
|                            |       |     |     | 45  |      | 1.79          | 2 |
|                            |       |     |     | 60  |      | 1.75          | 1 |
|                            |       |     |     | 60  |      | 1.65          | 2 |
|                            |       |     |     | 90  |      | 2.25          | 1 |
|                            |       |     |     | 90  |      | 2.32          | 2 |

|                            |     |     |     |     |      |               |   |
|----------------------------|-----|-----|-----|-----|------|---------------|---|
| Metoprolol<br>(0.04 mg/mL) | Dog | 6.8 | A-B | 0   | 23.6 | None Detected | 1 |
|                            |     |     |     | 0   | 12.4 | None Detected | 2 |
|                            |     |     |     | 120 | 11.2 | 0.546         | 1 |
|                            |     |     |     | 120 | 26.2 | 0.433         | 2 |
|                            |     |     |     | 15  |      | < 0.2         | 1 |
|                            |     |     |     | 15  |      | < 0.2         | 2 |
|                            |     |     |     | 30  |      | < 0.2         | 1 |
|                            |     |     |     | 30  |      | < 0.2         | 2 |
|                            |     |     |     | 45  |      | 0.292         | 1 |
|                            |     |     |     | 45  |      | < 0.2         | 2 |
|                            |     |     |     | 60  |      | 0.381         | 1 |
|                            |     |     |     | 60  |      | 0.302         | 2 |
|                            |     |     |     | 90  |      | 0.458         | 1 |
|                            |     |     |     | 90  |      | 0.342         | 2 |
| Metoprolol<br>(0.04 mg/mL) | Dog | 7.4 | A-B | 0   | 24.3 | None Detected | 1 |
|                            |     |     |     | 0   | 24.7 | None Detected | 2 |
|                            |     |     |     | 120 | 17.4 | 0.642         | 1 |
|                            |     |     |     | 120 | 17.1 | 0.647         | 2 |
|                            |     |     |     | 15  |      | < 0.2         | 1 |
|                            |     |     |     | 15  |      | < 0.2         | 2 |
|                            |     |     |     | 30  |      | 0.291         | 1 |
|                            |     |     |     | 30  |      | 0.278         | 2 |
|                            |     |     |     | 45  |      | 0.351         | 1 |
|                            |     |     |     | 45  |      | 0.384         | 2 |
|                            |     |     |     | 60  |      | 0.488         | 1 |



|                            |     |     |     |     |      |               |   |
|----------------------------|-----|-----|-----|-----|------|---------------|---|
|                            |     |     |     | 60  |      | 0.458         | 2 |
|                            |     |     |     | 90  |      | 0.549         | 1 |
|                            |     |     |     | 90  |      | 0.506         | 2 |
| Metoprolol<br>(0.04 mg/mL) | Dog | 7.4 | B-A | 0   | 23.1 | None Detected | 1 |
|                            |     |     |     | 0   | 24.7 | None Detected | 2 |
|                            |     |     |     | 120 | 23   | 1.09          | 1 |
|                            |     |     |     | 120 | 22.2 | 1.05          | 2 |
|                            |     |     |     | 15  |      | 0.696         | 1 |
|                            |     |     |     | 15  |      | 0.638         | 2 |
|                            |     |     |     | 30  |      | 0.801         | 1 |
|                            |     |     |     | 30  |      | 0.731         | 2 |
|                            |     |     |     | 45  |      | 0.844         | 1 |
|                            |     |     |     | 45  |      | 0.844         | 2 |
|                            |     |     |     | 60  |      | 0.896         | 1 |
|                            |     |     |     | 60  |      | 0.888         | 2 |
|                            |     |     |     | 90  |      | 0.963         | 1 |
|                            |     |     |     | 90  |      | 0.975         | 2 |
| Metoprolol<br>(0.4mg/mL)   | Dog | 6.8 | A-B | 0   | 281  | None Detected | 1 |
|                            |     |     |     | 0   | 287  | None Detected | 2 |
|                            |     |     |     | 120 | 260  | 2.94          | 1 |
|                            |     |     |     | 120 | 247  | 2.60          | 2 |
|                            |     |     |     | 15  |      | 0.293         | 1 |
|                            |     |     |     | 15  |      | 0.200         | 2 |
|                            |     |     |     | 30  |      | 0.593         | 1 |
|                            |     |     |     | 30  |      | 0.814         | 2 |
|                            |     |     |     | 45  |      | 1.02          | 1 |

|                                                           |     |     |     |     |     |               |   |
|-----------------------------------------------------------|-----|-----|-----|-----|-----|---------------|---|
|                                                           |     |     |     | 45  |     | 0.819         | 2 |
|                                                           |     |     |     | 60  |     | 1.49          | 1 |
|                                                           |     |     |     | 60  |     | 0.888         | 2 |
|                                                           |     |     |     | 90  |     | 2.70          | 1 |
|                                                           |     |     |     | 90  |     | 1.67          | 2 |
| Metoprolol<br>(0.4mg/mL) +<br>FITC Dextran<br>(200 µg/mL) | Dog | 6.8 | A-B | 0   | 283 | None Detected | 1 |
|                                                           |     |     |     | 0   | 287 | None Detected | 2 |
|                                                           |     |     |     | 120 | 252 | 3.03          | 1 |
|                                                           |     |     |     | 120 | 267 | 3.20          | 2 |
|                                                           |     |     |     | 15  |     | 0.368         | 1 |
|                                                           |     |     |     | 15  |     | 0.282         | 2 |
|                                                           |     |     |     | 30  |     | 0.897         | 1 |
|                                                           |     |     |     | 30  |     | 0.868         | 2 |
|                                                           |     |     |     | 45  |     | 1.18          | 1 |
|                                                           |     |     |     | 45  |     | 1.12          | 2 |
|                                                           |     |     |     | 60  |     | 1.54          | 1 |
|                                                           |     |     |     | 60  |     | 1.51          | 2 |
|                                                           |     |     |     | 90  |     | 2.60          | 1 |
|                                                           |     |     |     | 90  |     | 2.61          | 2 |

**Supplemental Table S2A:** Estimation of metoprolol (ppm) for absorptive (AB) and secretive permeability (BA) in canine colonoid-derived (dog) and Caco-2-derived (human) monolayers. \*Metoprolol (0.4 mg/mL) +/- FITC Dextran (200 µg/mL) testing was exclusively performed in canine colonoid monolayers.

| <b>Drug Conc.<br/>(mg/mL)</b> | <b>Species</b> | <b>AP<br/>(pH)</b> | <b>Direction</b> | <b>Time<br/>(min)</b> | <b>Don. Conc.<br/>(ppm)</b> | <b>Rec. Conc.<br/>(ppm)</b> | <b>Replicates</b> |
|-------------------------------|----------------|--------------------|------------------|-----------------------|-----------------------------|-----------------------------|-------------------|
| Atenolol (2<br>mg/mL)         | Human          | 6.8                | A-B              | 0                     | 3772.0                      | None Detected               | 1                 |
|                               |                |                    |                  | 0                     | 3890.0                      | None Detected               | 2                 |
|                               |                |                    |                  | 120                   | 2895.0                      | 52.2                        | 1                 |
|                               |                |                    |                  | 120                   | 2650.0                      | 50.8                        | 2                 |
|                               |                |                    |                  | 15                    |                             | 2.50                        | 1                 |
|                               |                |                    |                  | 15                    |                             | 1.3                         | 2                 |
|                               |                |                    |                  | 30                    |                             | 4.20                        | 1                 |
|                               |                |                    |                  | 30                    |                             | 2.1                         | 2                 |
|                               |                |                    |                  | 45                    |                             | 11.4                        | 1                 |
|                               |                |                    |                  | 45                    |                             | 7.4                         | 2                 |
|                               |                |                    |                  | 60                    |                             | 18.1                        | 1                 |
|                               |                |                    |                  | 60                    |                             | 9.0                         | 2                 |
|                               |                |                    |                  | 90                    |                             | 44.8                        | 1                 |
|                               |                |                    |                  | 90                    |                             | 45.4                        | 2                 |
| Atenolol (2<br>mg/mL)         | Human          | 7.4                | B-A              | 0                     | 902.0                       | None Detected               | 1                 |
|                               |                |                    |                  | 0                     | 1090.0                      | None Detected               | 2                 |
|                               |                |                    |                  | 120                   | 1053.0                      | 8.8                         | 1                 |
|                               |                |                    |                  | 120                   | 989.0                       | 9.6                         | 2                 |
|                               |                |                    |                  | 15                    |                             | 1.9                         | 1                 |
|                               |                |                    |                  | 15                    |                             | 1.9                         | 2                 |
|                               |                |                    |                  | 30                    |                             | 2.5                         | 1                 |
|                               |                |                    |                  | 30                    |                             | 2.6                         | 2                 |
|                               |                |                    |                  | 45                    |                             | 4.3                         | 1                 |
|                               |                |                    |                  | 45                    |                             | 4.40                        | 2                 |

|                    |     |     |     |     |      |               |   |
|--------------------|-----|-----|-----|-----|------|---------------|---|
|                    |     |     |     | 60  |      | 4.3           | 1 |
|                    |     |     |     | 60  |      | 4.2           | 2 |
|                    |     |     |     | 90  |      | 10.9          | 1 |
|                    |     |     |     | 90  |      | 11.0          | 2 |
| Atenolol (2 mg/mL) | Dog | 6.8 | A-B | 0   | 993  | None Detected | 1 |
|                    |     |     |     | 0   | 1031 | None Detected | 2 |
|                    |     |     |     | 120 | 1073 | < 0.5         | 1 |
|                    |     |     |     | 120 | 1019 | < 0.5         | 2 |
|                    |     |     |     | 15  |      | < 0.5         | 1 |
|                    |     |     |     | 15  |      | < 0.5         | 2 |
|                    |     |     |     | 30  |      | < 0.5         | 1 |
|                    |     |     |     | 30  |      | < 0.5         | 2 |
|                    |     |     |     | 45  |      | < 0.5         | 1 |
|                    |     |     |     | 45  |      | < 0.5         | 2 |
|                    |     |     |     | 60  |      | < 0.5         | 1 |
|                    |     |     |     | 60  |      | < 0.5         | 2 |
|                    |     |     |     | 90  |      | < 0.5         | 1 |
|                    |     |     |     | 90  |      | < 0.5         | 2 |
| Atenolol (2 mg/mL) | Dog | 7.4 | A-B | 0   | 544  | None Detected | 1 |
|                    |     |     |     | 0   | 547  | None Detected | 2 |
|                    |     |     |     | 120 | 438  | < 0.5         | 1 |
|                    |     |     |     | 120 | 498  | < 0.5         | 2 |
|                    |     |     |     | 15  |      | < 0.5         | 1 |
|                    |     |     |     | 15  |      | < 0.5         | 2 |
|                    |     |     |     | 30  |      | < 0.5         | 1 |
|                    |     |     |     | 30  |      | < 0.5         | 2 |

|                    |       |     |     |     |       |               |   |
|--------------------|-------|-----|-----|-----|-------|---------------|---|
|                    |       |     |     | 45  |       | < 0.5         | 1 |
|                    |       |     |     | 45  |       | < 0.5         | 2 |
|                    |       |     |     | 60  |       | < 0.5         | 1 |
|                    |       |     |     | 60  |       | < 0.5         | 2 |
|                    |       |     |     | 90  |       | < 0.5         | 1 |
|                    |       |     |     | 90  |       | < 0.5         | 2 |
| Atenolol (2 mg/mL) | Dog   | 7.4 | B-A | 0   | 522   | None Detected | 1 |
|                    |       |     |     | 0   | 501   | None Detected | 2 |
|                    |       |     |     | 120 | 485   | < 0.5         | 1 |
|                    |       |     |     | 120 | 541   | < 0.5         | 2 |
|                    |       |     |     | 15  |       | < 0.5         | 1 |
|                    |       |     |     | 15  |       | < 0.5         | 2 |
|                    |       |     |     | 30  |       | < 0.5         | 1 |
|                    |       |     |     | 30  |       | < 0.5         | 2 |
|                    |       |     |     | 45  |       | < 0.5         | 1 |
|                    |       |     |     | 45  |       | < 0.5         | 2 |
|                    |       |     |     | 60  |       | < 0.5         | 1 |
|                    |       |     |     | 60  |       | < 0.5         | 2 |
|                    |       |     |     | 90  |       | < 0.5         | 1 |
|                    |       |     |     | 90  |       | < 0.5         | 2 |
| Atenolol (2 mg/mL) | Human | 6.8 | A-B | 0   | 266.0 | None Detected | 1 |
|                    |       |     |     | 0   | 249.0 | None Detected | 2 |
|                    |       |     |     | 120 | 266.0 | <0.5          | 1 |
|                    |       |     |     | 120 | 265.0 | 0.62          | 2 |
|                    |       |     |     | 15  |       | <0.5          | 1 |
|                    |       |     |     | 15  |       | <0.5          | 2 |

|                    |       |     |     |     |       |               |   |
|--------------------|-------|-----|-----|-----|-------|---------------|---|
|                    |       |     |     | 30  |       | <0.5          | 1 |
|                    |       |     |     | 30  |       | <0.5          | 2 |
|                    |       |     |     | 45  |       | <0.5          | 1 |
|                    |       |     |     | 45  |       | <0.5          | 2 |
|                    |       |     |     | 60  |       | <0.5          | 1 |
|                    |       |     |     | 60  |       | <0.5          | 2 |
|                    |       |     |     | 90  |       | <0.5          | 1 |
|                    |       |     |     | 90  |       | <0.5          | 2 |
| Atenolol (2 mg/mL) | Human | 7.4 | B-A |     | 173.0 | None Detected |   |
|                    |       |     |     | 0   |       |               | 1 |
|                    |       |     |     | 0   | 157.0 | None Detected | 2 |
|                    |       |     |     | 120 | 158.0 | 0.77          | 1 |
|                    |       |     |     | 120 | 162.0 | 1.79          | 2 |
|                    |       |     |     | 15  |       | <0.5          | 1 |
|                    |       |     |     | 15  |       | <0.5          | 2 |
|                    |       |     |     | 30  |       | <0.5          | 1 |
|                    |       |     |     | 30  |       | <0.5          | 2 |
|                    |       |     |     | 45  |       | <0.5          | 1 |
|                    |       |     |     | 45  |       | <0.5          | 2 |
|                    |       |     |     | 60  |       | <0.5          | 1 |
|                    |       |     |     | 60  |       | <0.5          | 2 |
|                    |       |     |     | 90  |       | 0.68          | 1 |
|                    |       |     |     | 90  |       | 0.84          | 2 |
| Atenolol (2 mg/mL) | Dog   | 6.8 | A-B |     | 274.9 | <0.5          |   |
|                    |       |     |     | 0   |       |               | 1 |
|                    |       |     |     | 0   | 274.1 | <0.5          | 2 |
|                    |       |     |     | 120 | 273.2 | <0.5          | 1 |
|                    |       |     |     | 120 | 275.0 | <0.5          | 2 |

|                    |     |     |     |     |       |               |   |
|--------------------|-----|-----|-----|-----|-------|---------------|---|
|                    |     |     |     | 15  |       | <0.5          | 1 |
|                    |     |     |     | 15  |       | <0.5          | 2 |
|                    |     |     |     | 30  |       | <0.5          | 1 |
|                    |     |     |     | 30  |       | <0.5          | 2 |
|                    |     |     |     | 45  |       | <0.5          | 1 |
|                    |     |     |     | 45  |       | <0.5          | 2 |
|                    |     |     |     | 60  |       | <0.5          | 1 |
|                    |     |     |     | 60  |       | <0.5          | 2 |
|                    |     |     |     | 90  |       | <0.5          | 1 |
|                    |     |     |     | 90  |       | <0.5          | 2 |
| Atenolol (2 mg/mL) | Dog | 7.4 | A-B | 0   | 256.6 | None Detected | 1 |
|                    |     |     |     | 0   | 241.1 | None Detected | 2 |
|                    |     |     |     | 120 | 249.4 | <0.5          | 1 |
|                    |     |     |     | 120 | 238.2 | <0.5          | 2 |
|                    |     |     |     | 15  |       | <0.5          | 1 |
|                    |     |     |     | 15  |       | <0.5          | 2 |
|                    |     |     |     | 30  |       | <0.5          | 1 |
|                    |     |     |     | 30  |       | <0.5          | 2 |
|                    |     |     |     | 45  |       | <0.5          | 1 |
|                    |     |     |     | 45  |       | <0.5          | 2 |
|                    |     |     |     | 60  |       | <0.5          | 1 |
|                    |     |     |     | 60  |       | <0.5          | 2 |
|                    |     |     |     | 90  |       | <0.5          | 1 |
|                    |     |     |     | 90  |       | <0.5          | 2 |
| Atenolol (2 mg/mL) | Dog | 7.4 | B-A | 0   | 259.0 | <0.5          | 1 |
|                    |     |     |     | 0   | 262.5 | <0.5          | 2 |

|  |  |  |  |     |       |               |   |
|--|--|--|--|-----|-------|---------------|---|
|  |  |  |  | 120 | 261.8 | 2             | 1 |
|  |  |  |  |     | 258.6 | Approximately |   |
|  |  |  |  | 120 |       | 0.7           | 2 |
|  |  |  |  | 15  |       | <0.5          | 1 |
|  |  |  |  | 15  |       | <0.5          | 2 |
|  |  |  |  | 30  |       | <0.5          | 1 |
|  |  |  |  | 30  |       | <0.5          | 2 |
|  |  |  |  | 45  |       | <0.5          | 1 |
|  |  |  |  | 45  |       | <0.5          | 2 |
|  |  |  |  |     |       | Approximately |   |
|  |  |  |  | 60  |       | 0.7           | 1 |
|  |  |  |  | 60  |       | <0.5          | 2 |
|  |  |  |  | 90  |       | <0.5          | 1 |
|  |  |  |  | 90  |       | <0.5          | 2 |

**Supplemental Table S2B:** Estimation of atenolol (ppm) for absorptive (AB) and secretive permeability (BA) in canine colonoid-derived (dog) and Caco-2-derived (human) monolayers.



| Drug Conc.<br>(mg/mL)    | Species | AP<br>(pH) | Direction | Time<br>(min) | Don. Conc.<br>(ppm) | Rec. Conc.<br>(ppm) | Replicates |
|--------------------------|---------|------------|-----------|---------------|---------------------|---------------------|------------|
| Propranolol (1<br>mg/mL) | Human   | 6.8        | A-B       | 0             | 588                 | None<br>Detected    | 1          |
|                          |         |            |           | 0             | 612                 | None<br>Detected    | 2          |
|                          |         |            |           | 120           | 455                 | 18.6                | 1          |
|                          |         |            |           | 120           | 489                 | 17.7                | 2          |
|                          |         |            |           | 15            |                     | 3.01                | 1          |
|                          |         |            |           | 15            |                     | 2.65                | 2          |
|                          |         |            |           | 30            |                     | 7.13                | 1          |
|                          |         |            |           | 30            |                     | 5.09                | 2          |
|                          |         |            |           | 45            |                     | 8.23                | 1          |
|                          |         |            |           | 45            |                     | 8.61                | 2          |
|                          |         |            |           | 60            |                     | 8.98                | 1          |
|                          |         |            |           | 60            |                     | 10.4                | 2          |
|                          |         |            |           | 90            |                     | 11.8                | 1          |
|                          |         |            |           | 90            |                     | 15.6                | 2          |
| Propranolol (1<br>mg/mL) | Human   | 7.4        | A-B       | 0             | 598                 | None<br>Detected    | 1          |
|                          |         |            |           | 0             | 585                 | None<br>Detected    | 2          |
|                          |         |            |           | 120           | 421                 | 14.9                | 1          |
|                          |         |            |           | 120           | 451                 | 15.6                | 2          |
|                          |         |            |           | 15            |                     | 2.66                | 1          |
|                          |         |            |           | 15            |                     | 1.58                | 2          |
|                          |         |            |           | 30            |                     | 4.33                | 1          |
|                          |         |            |           | 30            |                     | 4.55                | 2          |

|                       |     |     |     |     |      |               |   |
|-----------------------|-----|-----|-----|-----|------|---------------|---|
|                       |     |     |     | 45  |      | 6.04          | 1 |
|                       |     |     |     | 45  |      | 7.05          | 2 |
|                       |     |     |     | 60  |      | 8.37          | 1 |
|                       |     |     |     | 60  |      | 8.63          | 2 |
|                       |     |     |     | 90  |      | 10.6          | 1 |
|                       |     |     |     | 90  |      | 13.6          | 2 |
| Propranolol (1 mg/mL) | Dog | 6.8 | A-B | 0   | 1186 | None Detected | 1 |
|                       |     |     |     | 0   | 1164 | None Detected | 2 |
|                       |     |     |     | 120 | 882  | 35.0          | 1 |
|                       |     |     |     | 120 | 912  | 33.0          | 2 |
|                       |     |     |     | 15  |      | 11.0          | 1 |
|                       |     |     |     | 15  |      | 12.0          | 2 |
|                       |     |     |     | 30  |      | 18.4          | 1 |
|                       |     |     |     | 30  |      | 17.0          | 2 |
|                       |     |     |     | 45  |      | 22.6          | 1 |
|                       |     |     |     | 45  |      | 21.0          | 2 |
|                       |     |     |     | 60  |      | 28.5          | 1 |
|                       |     |     |     | 60  |      | 26.3          | 2 |
|                       |     |     |     | 90  |      | 30.2          | 1 |
|                       |     |     |     | 90  |      | 28.5          | 2 |
| Propranolol (1 mg/mL) | Dog | 7.4 | A-B | 0   | 1175 | None Detected | 1 |
|                       |     |     |     | 0   | 1080 | None Detected | 2 |
|                       |     |     |     | 120 | 817  | 33.0          | 1 |
|                       |     |     |     | 120 | 851  | 31.5          | 2 |

|                       |     |     |     |     |      |               |   |
|-----------------------|-----|-----|-----|-----|------|---------------|---|
|                       |     |     |     | 15  |      | 10.7          | 1 |
|                       |     |     |     | 15  |      | 11.0          | 2 |
|                       |     |     |     | 30  |      | 16.4          | 1 |
|                       |     |     |     | 30  |      | 17.7          | 2 |
|                       |     |     |     | 45  |      | 22.9          | 1 |
|                       |     |     |     | 45  |      | 21.1          | 2 |
|                       |     |     |     | 60  |      | 24.8          | 1 |
|                       |     |     |     | 60  |      | 27.7          | 2 |
|                       |     |     |     | 90  |      | 26.7          | 1 |
|                       |     |     |     | 90  |      | 31.0          | 2 |
| Propranolol (1 mg/mL) | Dog | 7.4 | B-A | 0   | 1110 | None Detected | 1 |
|                       |     |     |     | 0   | 1121 | None Detected | 2 |
|                       |     |     |     | 120 | 914  | 44.3          | 1 |
|                       |     |     |     | 120 | 979  | 47.2          | 2 |
|                       |     |     |     | 15  |      | 27.6          | 1 |
|                       |     |     |     | 15  |      | 26.5          | 2 |
|                       |     |     |     | 30  |      | 33.9          | 1 |
|                       |     |     |     | 30  |      | 36.7          | 2 |
|                       |     |     |     | 45  |      | 41.4          | 1 |
|                       |     |     |     | 45  |      | 44.5          | 2 |
|                       |     |     |     | 60  |      | 32.7          | 1 |
|                       |     |     |     | 60  |      | 42.5          | 2 |
|                       |     |     |     | 90  |      | 38.0          | 1 |
|                       |     |     |     | 90  |      | 43.5          | 2 |

**Supplemental Table S2C:** Estimation of propranolol (ppm) absorptive (AB) and secretive permeability (BA) in canine colonoid-derived (dog) and Caco-2-derived (human) monolayers.
